# Supplementary material for: Enhanced UV stability of N-halamine-immobilized Fe3O4@SiO2@TiO2 nanoparticles: synthesis, characteristics and antibacterial property
Source: Royal Society of Chemistry journal article supplement (doi:10.1039/d0nj01439g), 2020-01-01
Supplement: d0nj01439g1.pdf [file d0nj01439g1.pdf]

## ***Electronic Supplementary Information***

### **Enhanced UV stability of *N*-halamine-immobilized Fe<sub>3</sub>O<sub>4</sub>@SiO<sub>2</sub>@TiO<sub>2</sub> nanoparticles: synthesis, characteristics and antibacterial property**

Danlin Bu, Na Li, Yu Zhou, Hengyu Feng, Fei Yu, Chunxia Cheng, Ming Li, Linghan Xiao\* and Yuhui Ao\*

<sup>a</sup>School of Chemistry and Life Science, Changchun University of Technology, Changchun 130012, China.

<sup>b</sup>Advanced Institute of Materials Science, Changchun University of Technology, Changchun 130012, China.

<sup>c</sup>Jilin Province Key Laboratory of Carbon Fiber Development and Application, Changchun University of Technology, Changchun 130012, China.

E-mail: xiaolinghan1981@163.com

#### Table of Contents

##### Pages

S2–3 §1. Characterization of Fe<sub>3</sub>O<sub>4</sub>@SiO<sub>2</sub> with different amounts of tetrabutyl titanate

S3 §2. MIC and MBC of *N*-halamine-immobilized Fe<sub>3</sub>O<sub>4</sub>@SiO<sub>2</sub>@TiO<sub>2</sub>

## §1. Characterization of $\text{Fe}_3\text{O}_4@\text{SiO}_2$ with different amounts of tetrabutyl titanate

Under the same preparation conditions, the amount of  $\text{TiO}_2$  hydrolyzed to the surface of  $\text{Fe}_3\text{O}_4@\text{SiO}_2$  was various with different doses of tetrabutyl titanate (TBOT) which directly led to different shell thickness of  $\text{TiO}_2$ . Fig. 1S was the SEM (left) and TEM (right) pictures of *N*-halamine-modified  $\text{Fe}_3\text{O}_4@\text{SiO}_2@\text{TiO}_2$  nanoparticles that the dosage of TBOT is 0.2 mL, 0.4 mL and 0.6 mL, respectively. As shown in Fig. 1S-a1 and a2, the  $\text{TiO}_2$  particles on the surface of  $\text{SiO}_2$  were maldistribution and even could not completely cover the  $\text{SiO}_2$  layer, which may be due to the low dose of TBOT. Fig. 1S-c1 and c2 were SEM and TEM of F@S@T-0.6 samples. The stacking gap between the  $\text{TiO}_2$  nanoparticles was slightly larger, and there were extra single  $\text{TiO}_2$  particles outside the sample, and there was a certain agglomeration phenomenon between the F@S@T-0.6 particles, which may be caused by the excessive dose of TBOT. From the SEM and TEM images of F@S@T-0.4 in Fig. 1S-b1 and b2, it was observed that the  $\text{TiO}_2$  particles of F@S@T-0.4 were different from the other two, which were dense and the particle distribution is more uniform.

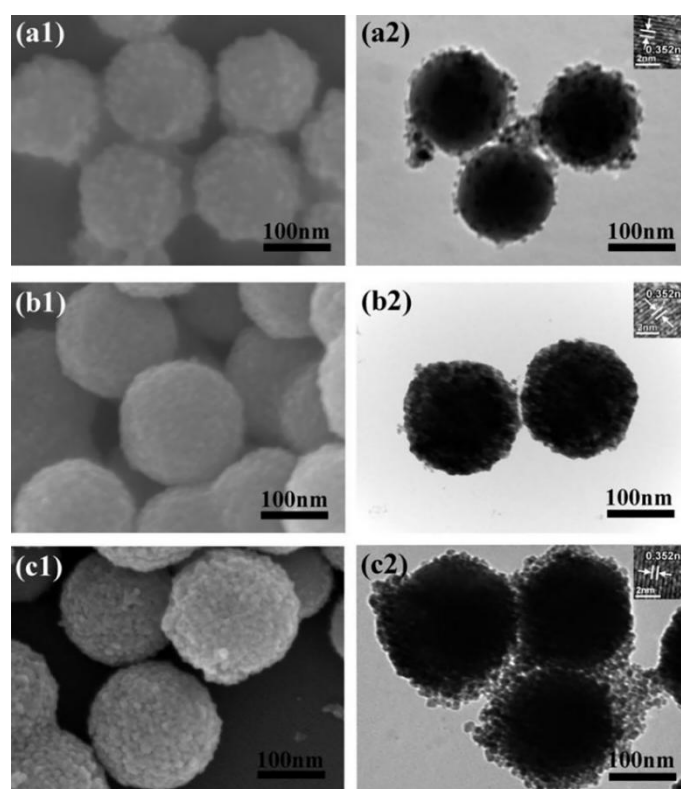

**Fig 1S.** SEM (left) and TEM (right) pictures of (a1 and a2) F@S@T- 0.2, (b1 and b2) F@S@T-0.4 and (c1 and c2) F@S@T-0.6, illustrated with corresponding sample  $\text{TiO}_2$  shell HTEM pictures.

The XRD of *N*-halamine-modified Fe<sub>3</sub>O<sub>4</sub>@SiO<sub>2</sub>@TiO<sub>2</sub> nanoparticles with different doses of TBOT is shown in Fig 2S.

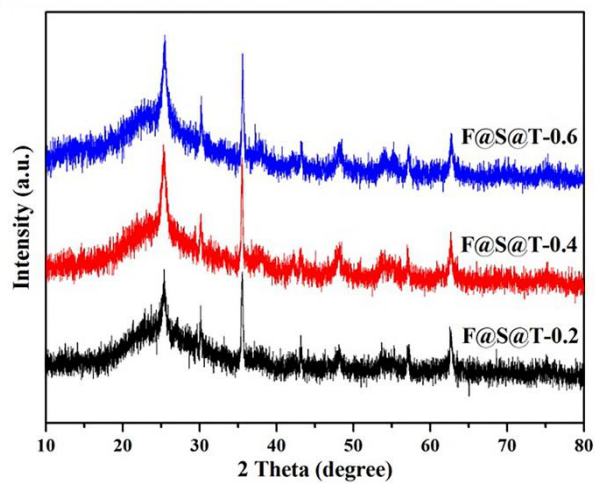

Fig 2S. XRD of Fe<sub>3</sub>O<sub>4</sub>@SiO<sub>2</sub> with different amounts of TBOT

## §2. MIC and MBC of *N*-halamine-immobilized Fe<sub>3</sub>O<sub>4</sub>@SiO<sub>2</sub>@TiO<sub>2</sub>

Table 1S. MIC of Fe<sub>3</sub>O<sub>4</sub>@SiO<sub>2</sub>@TiO<sub>2</sub> and *N*-halamine-immobilized Fe<sub>3</sub>O<sub>4</sub>@SiO<sub>2</sub>@TiO<sub>2</sub> nanoparticles

| Bacteria | MIC (mg/mL) |  | MBC (mg/mL) |  |
|----------|-------------|--|-------------|--|
|          | F@S@T-Cl    |  | F@S@T-Cl    |  |
| S.aureus | 0.256       |  | 0.520       |  |
| E.coil   | 0.510       |  | 0.725       |  |
